# Supplementary material
Source: PubMed Central journal article supplement (PMC3138252)
Supplement: supp_M111.248070_jbc.M111.248070-1.pdf [file supp_M111.248070_jbc.M111.248070-1.pdf]

Table S1. PROCHECK analysis of homology-modeled SLH domains from *Bacillus anthracis*

| Polypeptide |      | PROCHECK allowed regions ( non Gly/Pro residues) |                |                            |                           |            |                       |
|-------------|------|--------------------------------------------------|----------------|----------------------------|---------------------------|------------|-----------------------|
| NCBI locus  | Name | Identity/<br>similarity <sup>a</sup>             | Most (A, B, L) | Additional<br>(a, b, l, p) | Generous<br>(~a, b, l, p) | Disallowed | G-factor <sup>b</sup> |
| BAS0841     | Sap  | -                                                | 138 (92%)      | 12 (8%)                    | 0                         | 0          | 0.17                  |
| BAS0842     | EA1  | 59/75                                            | 143 (94.7%)    | 8 (5.3%)                   | 0                         | 0          | 0.05                  |
| pXO1-90     | BsIA | 28/46                                            | 145 (86.6%)    | 18 (10.7%)                 | 3 (1.8%)                  | 2 (1.2%)   | -0.13                 |
| pXO1-54     | BsIB | 34/52                                            | 137 (89%)      | 14 (9.1%)                  | 2 (1.3%)                  | 1 (0.6%)   | -0.12                 |
| BAS0916     | BsIC | 28/45                                            | 146 (90.1%)    | 13 (8.0%)                  | 1 (0.6%)                  | 2 (1.2%)   | -0.04                 |
| BAS1048     | BsID | 33/51                                            | 140 (90.3%)    | 12 (7.7%)                  | 1 (0.6%)                  | 2 (1.3%)   | -0.09                 |
| BAS1049     | BsIE | 30/48                                            | 136 (87.2%)    | 18 (11.5%)                 | 1 (0.6%)                  | 1 (0.6%)   | -0.06                 |
| BAS1050     | BsIF | 29/46                                            | 130 (86.1%)    | 19 (12.6%)                 | 1 (0.7%)                  | 1 (0.7%)   | -0.13                 |
| BAS1787     | BsIG | 30/49                                            | 140 (90.3%)    | 14 (9.0%)                  | 0                         | 1 (0.6%)   | -0.07                 |
| BAS2160     | BsIH | 35/53                                            | 139 (91.4%)    | 13 (8.6%)                  | 0                         | 0          | -0.06                 |
| BAS3093     | BsII | 33/49                                            | 144 (91.1%)    | 12 (7.6%)                  | 2 (1.3%)                  | 0          | -0.1                  |
| BAS3425     | BsIJ | 30/48                                            | 139 (87.4%)    | 17 (10.7%)                 | 3 (1.9%)                  | 0          | -0.1                  |
| BAS1021     | BsIK | 52/67                                            | 144 (92.3%)    | 8 (5.1%)                   | 3 (1.9%)                  | 1 (0.6%)   | -0.05                 |
| BAS1246     | BsIL | 33/55                                            | 140 (92.7%)    | 10 (6.6%)                  | 0                         | 1 (0.7%)   | 0                     |
| BAS2613     | BsIM | 28/50                                            | 141 (86.0 %)   | 23 (14.0%)                 | 0                         | 0          | -0.2                  |
| BAS4693     | BsIN | 27/45                                            | 138 (90.2%)    | 14 (9.2%)                  | 0                         | 1 (0.7%)   | -0.04                 |
| BAS1683     | BsIO | 34/50                                            | 144 (92.3%)    | 10 (6.4%)                  | 2 (1.3%)                  | 0          | -0.07                 |
| BAS0829     | BsIP | 28/44                                            | 140 (88.1%)    | 15 (9.4%)                  | 3 (1.9%)                  | 1 (0.6%)   | -0.12                 |
| BAS3089     | BsIQ | 26/43                                            | 143 (89.9%)    | 12 (7.5%)                  | 3 (1.9%)                  | 1 (0.6%)   | -0.07                 |
| BAS3463     | BsIR | 28/48                                            | 137 (90.7%)    | 11 (7.3%)                  | 1 (0.7%)                  | 2 (1.3%)   | -0.05                 |
| BAS0851     | BsIS | 55/69                                            | 136 (91.9%)    | 9 (6.1%)                   | 1 (0.7%)                  | 2 (1.4%)   | -0.04                 |
| BAS1682     | BsIT | 86/92                                            | 143 (93.5%)    | 10 (6.5%)                  | 0                         | 0          | -0.06                 |
| BAS2351     | BsIU | 53/68                                            | 137 (89.5%)    | 13 (8.5%)                  | 3 (2.0%)                  | 0          | -0.05                 |
| pXO2-42     | AmiA | 55/71                                            | 139 (93.3%)    | 8 (5.4%)                   | 1 (0.7%)                  | 1 (0.7%)   | -0.03                 |

<sup>a</sup>Peptide sequence identity / similarity in percent (%) as compared to *B. anthracis* Sap.

<sup>b</sup> The overall average of the G-factor is indicated.
